# Supplementary material
Source: PubMed Central journal article supplement (PMC4123949)
Supplement: pr5004938_si_001.pdf [file pr5004938_si_001.pdf]

## Supplementary Information

Discovery of chromatin-associated proteins via sequence-specific capture and mass spectrometric protein identification in *Saccharomyces cerevisiae*

Julia Kennedy-Darling<sup>1</sup>, Hector Guillen-Ahlers<sup>2</sup>, Michael R Shortreed<sup>1</sup>, Mark Scalf<sup>1</sup>, Brian Frey<sup>1</sup>, Christina Kendzioriski<sup>3,5</sup>, Michael Olivier<sup>2</sup>, Audrey P Gasch<sup>4,5</sup>, Lloyd M Smith<sup>4,5,\*</sup>

<sup>1</sup> Department of Chemistry, University of Wisconsin, Madison, WI

<sup>2</sup> Department of Genetics, Texas Biomedical Research Institute, San Antonio, TX

<sup>3</sup> Department of Biostatistics and Medical Informatics, University of Wisconsin, Madison, WI

<sup>4</sup> Laboratory of Genetics, University of Wisconsin, Madison, WI

<sup>5</sup> Genome Center of Wisconsin, Madison, WI

\* Corresponding Author

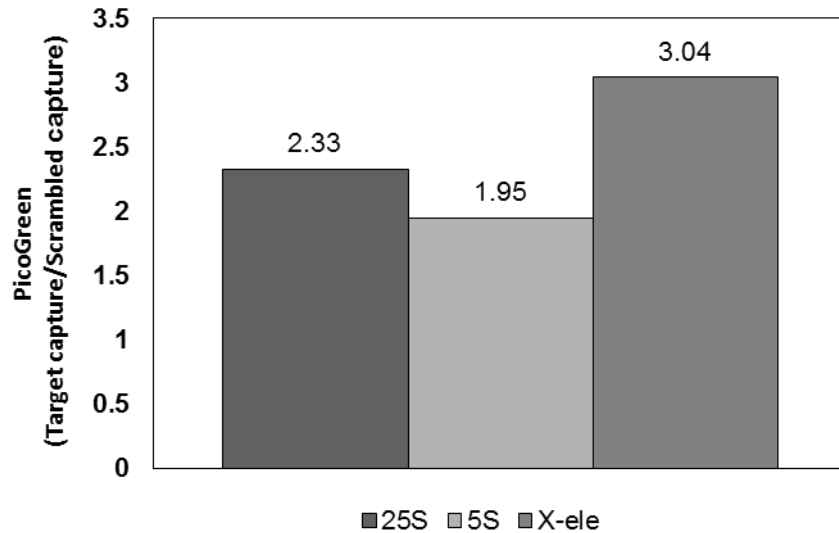

**Supplementary Figure 1. DNA capture specificity measured by PicoGreen fluorescence of total DNA captured.** HyCCAPP experiments were performed with four different capture oligonucleotides: 1) 25S rDNA, 2) 5S rDNA, 3) X-element and 4) scrambled. The total amount of captured DNA was measured with PicoGreen fluorescence. The ratios of the amount of DNA captured from each of the target loci divided by that captured by the scrambled oligonucleotide control are plotted. This ratio corresponds to the specificity of hybridization capture in the HyCCAPP experiments.

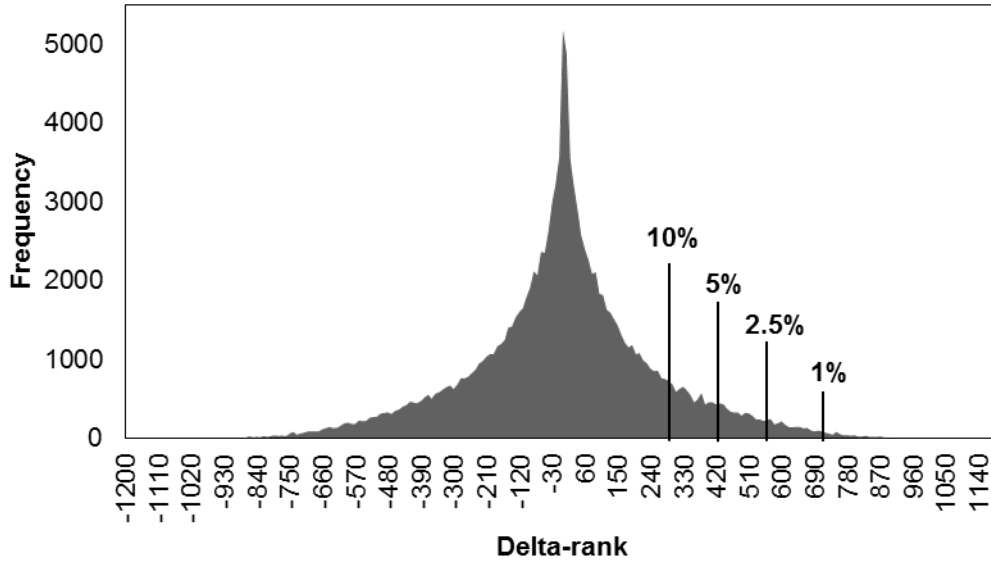

**Supplementary Figure 2. Yeast-lysate delta rank distribution for bioinformatics analysis**

**threshold determination.** The eight biological replicates of yeast lysate generated for HyCCAPP experiments were combined in all 70 possible pair-wise comparisons of averaged groups of four and delta-ranks were calculated for each iteration (A). In total, 129,952 delta-ranks were calculated and are plotted in the histogram. For each yeast lysate:yeast lysate comparison, threshold values for the delta-rank of the protein corresponding to 1% of each sample, 2.5%, 5% and 10% were determined. These ranks were averaged across all 70 combinations and are graphically depicted above with each threshold designation.

| Capture probes (5'-3') |                                |        |      |        |
|------------------------|--------------------------------|--------|------|--------|
| target                 | sequence                       | Tm(°C) | GC%  | length |
| 25S rDNA               | CTGAACTTAAGCATATCAATAAGCGGAGGA | 58.2   | 40.0 | 30     |
| 5S rDNA                | TTAACGGAAACGCAGGTGATATGAGGGCAG | 63.3   | 50.0 | 30     |
| X-element              | TAGAATATTTTTATGTTTAGGTGATTTAG  | 49.3   | 20.0 | 30     |
| GAL1-10-1              | CTTCTGGGATAGGAATCATATTTGGGAATC | 56.9   | 40.0 | 30     |
| GAL1-10-2              | CTCTAATAAAACGACAGTTCCCAAATGTT  | 56.1   | 33.3 | 30     |
| GAL1-10-3              | TGGCTACAGAATCATAAGTTGAATTCGACA | 58.0   | 36.7 | 30     |
| GAL1-10-4              | AGCACCACCTGTAACCAAAACAATTTAGTA | 58.9   | 36.7 | 30     |
| GAL1-10-5              | TTATCTTAGCCTAAAAAACCTTCTCTTTG  | 54.2   | 30.0 | 30     |
| GAL1-10-6              | ACAGCCCTCCGACGGAAGACTCTCTCCGT  | 69.4   | 63.3 | 30     |
| GAL1-10-7              | GGATGATAATGCGATTAGTTTTTTAGCCTT | 56.1   | 33.3 | 30     |
| GAL1-10-8              | CATAACCACTTTAACTAATACTTTCAACAT | 52.6   | 26.7 | 30     |
| GAL1-10-9              | TTGGCCGAAAAGTGCCCGAGCATAATTAAG | 62.6   | 46.7 | 30     |
| GAL1-10-10             | GTGAACATATTGATTATTGTGACTTCTCGG | 56.0   | 36.7 | 30     |
| Scrambled              | GCGCAAGCGCACCCCTCTGCGGGTCATATA | 69.7   | 63.3 | 30     |

**Supplementary Table 1. Capture oligonucleotide sequences.** The DNA sequences for the 13 capture oligonucleotides used in the HyCCAPP experiments are listed. All capture oligonucleotides were ordered from IDT and include a 5' desthiobiotin modification ((N-desthiobiotinyl-3-aminopropyl)-triethyleneglycol). The Tms were calculated using the IDT OligoAnalyzer (<http://www.idtdna.com/ANALYZER/Applications/OligoAnalyzer/default.aspx>) using default parameters (50mM [Na<sup>+</sup>] and 250nM [oligo]).

| <b>X-element qPCR assay</b> |                             |       |                      |
|-----------------------------|-----------------------------|-------|----------------------|
| Position                    | Sequence (5'-3')            | Tm    | Fluorophore/quencher |
| Left                        | GCCGCCGAATGAGATATAG         | 58.3  | ---                  |
| Right                       | CGGTTTATACCCTGTGCCAT        | 59.71 | ---                  |
| <b>Probe</b>                | CCCATAAAGCCCACGATTATCCACA   | 68.47 | 5'FAM - 3'TAMRA      |
| <b>25S rDNA qPCR assay</b>  |                             |       |                      |
| Position                    | Sequence (5'-3')            | Tm    | Fluorophore/quencher |
| Left                        | TTAGTAACGGCGAGTGAAGC        | 58.2  | ---                  |
| Right                       | CAAAGTTGCCCTCTCCAAAT        | 59.17 | ---                  |
| <b>Probe</b>                | TCTGGTACCTTCGGTGCCCGA       | 69.22 | 5'FAM - 3'TAMRA      |
| <b>5S rDNA qPCR assay</b>   |                             |       |                      |
| Position                    | Sequence (5'-3')            | Tm    | Fluorophore/quencher |
| Left                        | GTGCATTGTGATGTGGAGAA        | 58.02 | ---                  |
| Right                       | CTACCTCTGCATGCCACCTA        | 58.9  | ---                  |
| <b>Probe</b>                | CCGACCAACTTTCATGTTCTGTTTCG  | 68.55 | 5'FAM - 3'TAMRA      |
| <b>GAL10 qPCR assay</b>     |                             |       |                      |
| Position                    | Sequence (5'-3')            | Tm    | Fluorophore/quencher |
| Left                        | CAACCTCATAGAAGGGAATGTG      | 58.58 | ---                  |
| Right                       | TGTTGCTGATAACCTGTTCGAA      | 59.33 | ---                  |
| <b>Probe</b>                | TGCTTGGTCAAGACCTCTAACCTGGC  | 69.45 | 5'FAM - 3'TAMRA      |
| <b>GAL1 qPCR assay</b>      |                             |       |                      |
| Position                    | Sequence (5'-3')            | Tm    | Fluorophore/quencher |
| Left                        | TGCCCCGAGCATAATTAAGAA       | 58.4  | ---                  |
| Right                       | TACCAGGCGATCTAGCAACA        | 59.44 | ---                  |
| <b>Probe</b>                | AAATCCGGTTTAGCATCATAAGCGCTT | 68.12 | 5'FAM - 3'TAMRA      |
| <b>INO1 qPCR assay</b>      |                             |       |                      |
| Position                    | Sequence (5'-3')            | Tm    | Fluorophore/quencher |
| Left                        | GCAGCAGCATCTATCTTGGA        | 59.13 | ---                  |
| Right                       | GTTTTGTCCCGACTTGAGAT        | 58.99 | ---                  |
| <b>Probe</b>                | AGCCAGCTGAACCAAGCCGG        | 69.14 | 5'FAM - 3'TAMRA      |

**Supplementary Table 2. qPCR assay sequences.** The DNA sequences for the five qPCR assays used in the HyCCAPP experiments are listed. All qPCR assays were ordered from IDT. The assays were designed using the GenScript Real Time Primer Design Tool (<https://www.genscript.com/ssl-bin/app/primer>). The FAM modification at the probe 5' termini was 6-Carboxyfluorescein, and the TAMRA modification at the 3' termini was 5(6)-Carboxytetramethylrhodamine dT.

| GO Molecular Function (1646 categories)                                    |             |
|----------------------------------------------------------------------------|-------------|
| Category                                                                   | p-value     |
| oxidoreductase activity [GO:0016491]                                       | <1e-14      |
| catalytic activity [GO:0003824]                                            | <1e-14      |
| nucleotide binding [GO:0000166]                                            | 1.142E-09   |
| ATP binding [GO:0005524]                                                   | 2.708E-08   |
| binding [GO:0005488]                                                       | 8.817E-08   |
| transferase activity [GO:0016740]                                          | 9.418E-08   |
| pyridoxal phosphate binding [GO:0030170]                                   | 3.149E-07   |
| FMN binding [GO:0010181]                                                   | 0.000002023 |
| metallopeptidase activity [GO:0008237]                                     | 0.000002875 |
| GO Biological Process (2062 categories)                                    |             |
| Category                                                                   | p-value     |
| oxidation-reduction process [GO:0055114]                                   | <1e-14      |
| metabolic process [GO:0008152]                                             | 1.843E-14   |
| cellular amino acid biosynthetic process [GO:0008652]                      | 3.899E-12   |
| tricarboxylic acid cycle [GO:0006099]                                      | 0.000003996 |
| GO Cellular Component (625 categories)                                     |             |
| Category                                                                   | p-value     |
| cytoplasm [GO:0005737]                                                     | <1e-14      |
| proteasome complex [GO:0000502]                                            | 4.756E-12   |
| mitochondrion [GO:0005739]                                                 | 9.353E-12   |
| proteasome storage granule [GO:0034515]                                    | 5.47E-09    |
| cytosol [GO:0005829]                                                       | 0.00000372  |
| proteasome regulatory particle, lid subcomplex [GO:0008541]                | 0.000003872 |
| proteasome regulatory particle, base subcomplex [GO:0008540]               | 0.000009837 |
| chaperonin-containing T-complex [GO:0005832]                               | 0.000009837 |
| MIPS Functional Classification (459 categories)                            |             |
| Category                                                                   | p-value     |
| electron transport [20.01.15]                                              | 4.777E-12   |
| protein processing (proteolytic) [14.07.11]                                | 1.238E-09   |
| sugar, glucoside, polyol and carboxylate catabolism [01.05.02.07]          | 0.000001144 |
| electron transport and membrane-associated energy conservation [02.11]     | 0.000001309 |
| biosynthesis of serine [01.01.09.02.01]                                    | 0.000003027 |
| C-compound and carbohydrate metabolism [01.05]                             | 0.000003862 |
| proteasomal degradation (ubiquitin/proteasomal pathway) [14.13.01.01]      | 0.000004746 |
| tricarboxylic-acid pathway (citrate cycle, Krebs cycle, TCA cycle) [02.10] | 0.000006001 |
| NAD/NADP binding [16.21.07]                                                | 0.000006063 |

| MIPS Phenotypes (142 categories)               |             |
|------------------------------------------------|-------------|
| Category                                       | p-value     |
| Elongated cell and bud morphologies [52.10.10] | 0.00005411  |
| Canavanine sensitivity [92.05.10]              | 0.00006062  |
| MIPS Subcellular Localization (48 categories)  |             |
| Category                                       | p-value     |
| mitochondria [755]                             | <1e-14      |
| cytoplasm [725]                                | <1e-14      |
| ER [735]                                       | 4.496E-11   |
| ER membrane [735.01]                           | 2.332E-07   |
| nuclear envelope [750.01]                      | 0.000002597 |
| mitochondrial inner membrane [755.05]          | 0.00000521  |

**Supplementary Table 3. Complete list of GO enrichment for proteins that have a greater relative abundance in yeast lysate than in captured material.** Proteins on the left end of each delta-rank distribution for the four loci were combined and analyzed using FunSpec and are listed. There were 40 total GO terms enriched with a Bonferroni corrected p-value less than  $1 \times 10^{-4}$ .

| Protein | Locus          | Target qPCR (AB/no AB) | Target qPCR AB/off-target qPCR AB |
|---------|----------------|------------------------|-----------------------------------|
| Bdf1    | <i>GAL1-10</i> | 18.2*                  | 0.4                               |
| Spt20   | <i>GAL1-10</i> | 1.3                    | 0.5                               |
| Sth1    | <i>GAL1-10</i> | 5.3*                   | 0.7                               |
| Zeo1    | <i>GAL1-10</i> | 3.7                    | 0.7                               |
| Bre1    | 25S rDNA       | 3.0                    | 1.2                               |
| Ctf4    | 25S rDNA       | 22.0                   | 1.5                               |
| Ku70    | 25S rDNA       | 2.1                    | 2.0                               |
| Rtf2    | 25S rDNA       | 729.3*                 | 2.1                               |
| Sof1    | 25S rDNA       | 130.9                  | 21.8                              |
| Nop53   | 25S rDNA       | 33.6*                  | 2.4                               |
| Utp5    | 25S rDNA       | 880.1*                 | 63.0                              |
| Utp13   | 25S rDNA       | 257.4*                 | 35.9                              |
| Cdc25   | 25S rDNA       | 1.9*                   | 3.2                               |
| Ifh1    | 25S rDNA       | 3.27*                  | 5.6                               |
| Pde2    | 25S rDNA       | 5.60*                  | 2.2                               |
| Sak1    | 25S rDNA       | 3.4                    | 0.4                               |
| Sch9    | 25S rDNA       | 1.9                    | 0.5                               |

**Supplementary Table 4. CHIP-qPCR antibody/no-antibody and CHIP-qPCR target qPCR antibody/off-target qPCR antibody ratios demonstrate enrichment of TAP-tagged proteins at target DNA.** For each CHIP-qPCR performed, both a no antibody control and an off-target qPCR assay were used as controls. The ratios of the qPCR signal from the antibody pull-downs relative to the no antibody controls are shown in the third column. A qPCR assay measuring the *INO1* gene was used as the off-target control and the ratios of the target qPCR assays to the off-target qPCR assays are shown in the fourth column. The first four proteins (Bdf1, Spt20, Sth1 and Zeo1) were from the *GAL1-10* locus-specific HyCCAPP list, whereas the other 13 proteins (Bre1, Ctf4, Ku70, Rtf2, Sof1, Nop53, Utp5, Utp13, Cdc25, Ifh1, Pde2, Sak1 and Sch9) were from the 25S rDNA locus-specific HyCCAPP list. (\*indicates a p-value<0.05)
